# Supplementary material for: Improving alkaline pretreatment method for preparation of whole rice waste biomass feedstock and bioethanol production
Source: Royal Society of Chemistry journal article supplement (doi:10.1039/c5ra17797a), 2015-01-01
Supplement: c5ra17797a1.pdf [file c5ra17797a1.pdf]

## Supplementary Information

### Improving alkaline pretreatment method for preparation of whole rice waste biomass feedstock and bioethanol production

---

**Ganesh. D. Saratale<sup>1</sup> and Min-Kyu Oh<sup>1\*</sup>**

<sup>1</sup>Department of Chemical and Biological Engineering, Korea University, Seongbuk-gu, Seoul,  
South Korea 136-713

**\*Corresponding author:**

**Prof. Min Kyu Oh**

Department of Chemical and Biological Engineering,

Korea University, Seongbuk-gu,

Seoul, South Korea 136-713

Tel: +82-2-3290-3308

Fax: +82-2-3290-3308

E-mail: [mkoh@korea.ac.kr](mailto:mkoh@korea.ac.kr)

**Figure legends:**

**Fig. S1.** SEM of RWB biomass (A) control, (B) NaOH (C) H<sub>2</sub>O<sub>2</sub>, (D) ASC, (E) SB, (F) NaOH+H<sub>2</sub>O<sub>2</sub>, (G) NaOH+ASC, (H) NaOH+SB,(I) NaOH+ASC+SB.

**Fig. S2.** Effects of (A) different alkali concentration (0.5–3.0%), (B) incubation temperature (30, 100 and 121°C) and (C) incubation time (0-60 min) on the hydrolysis yield and reducing sugar production.

**Fig. S3.** Effects of (A) increasing substrate concentration (5–25 g L<sup>-1</sup>) and (B) increasing enzyme concentration (5–25 FPU g<sup>-1</sup> of the substrate) on the hydrolysis yield and reducing sugar production.

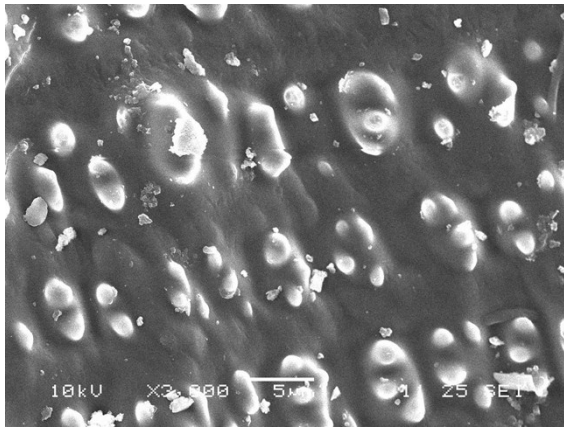

**(A)**

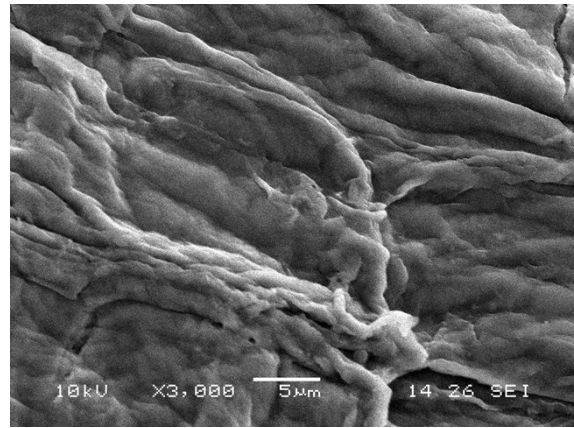

**(B)**

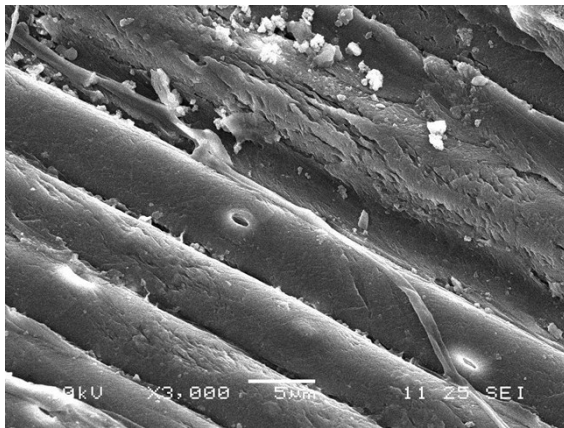

**(C)**

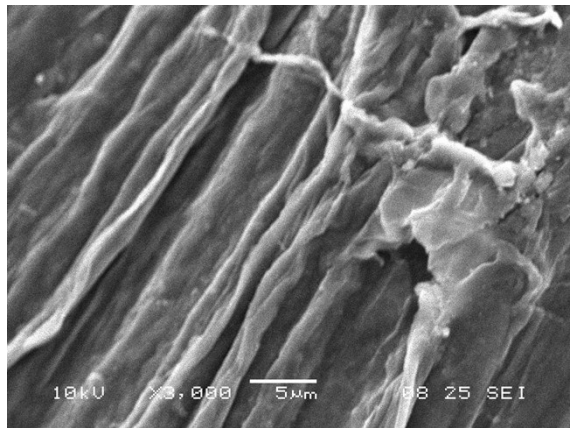

**(D)**

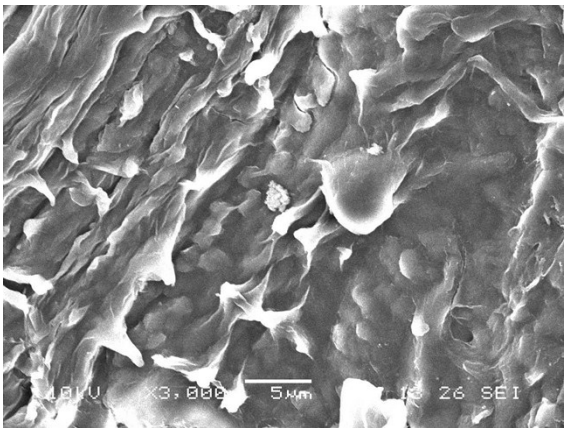

**(E)**

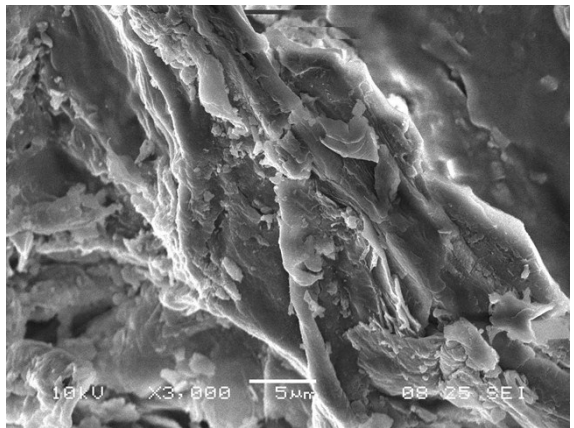

**(F)**

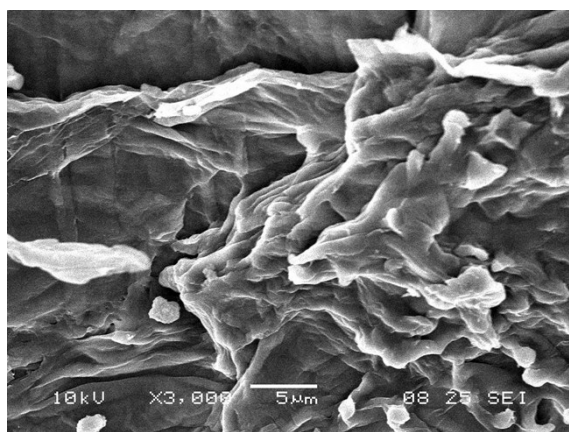

(G)

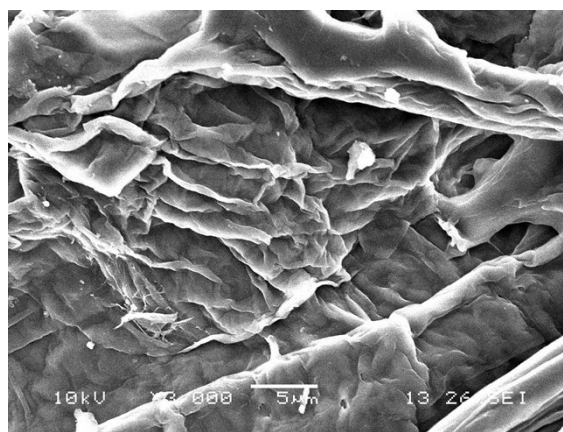

(H)

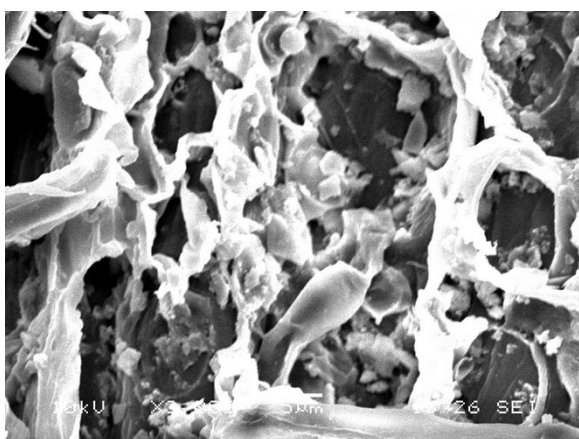

(I)

**Fig. S1.**

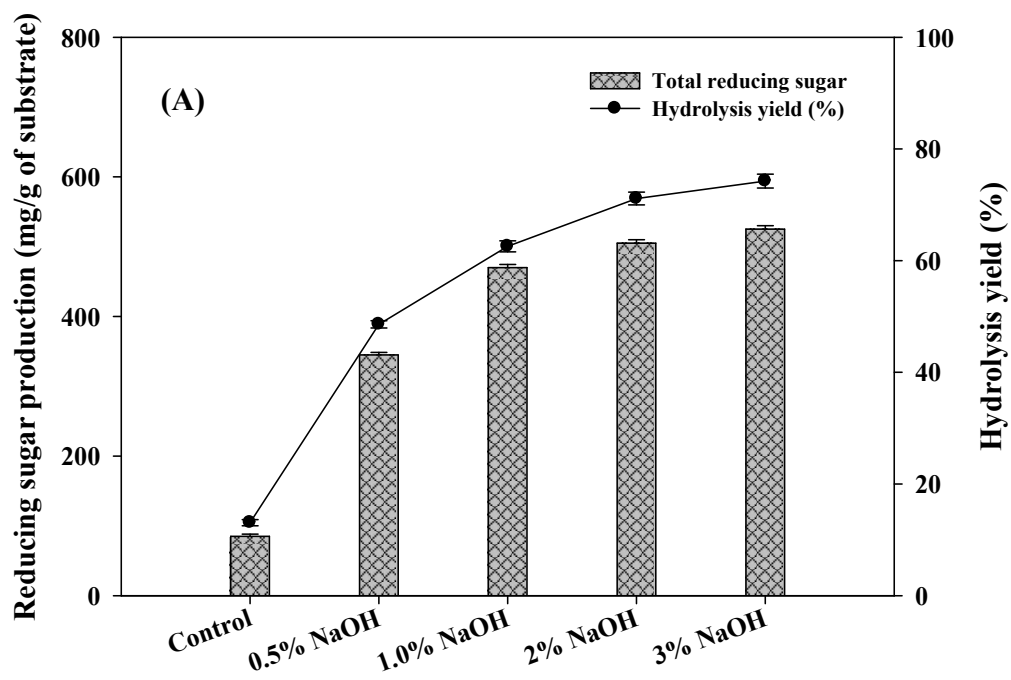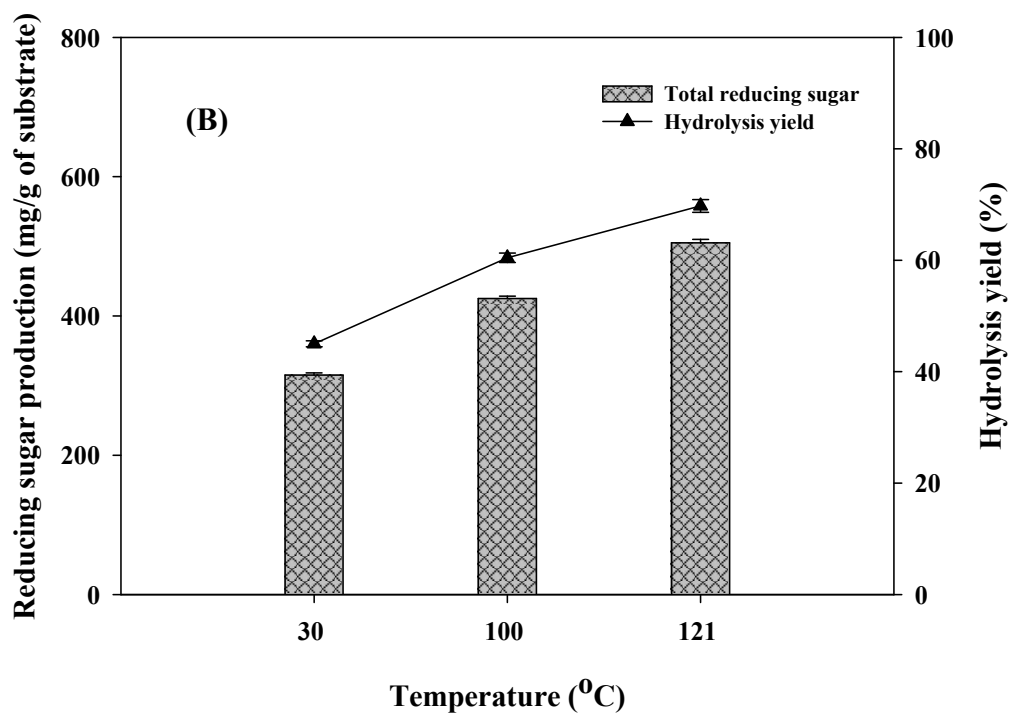

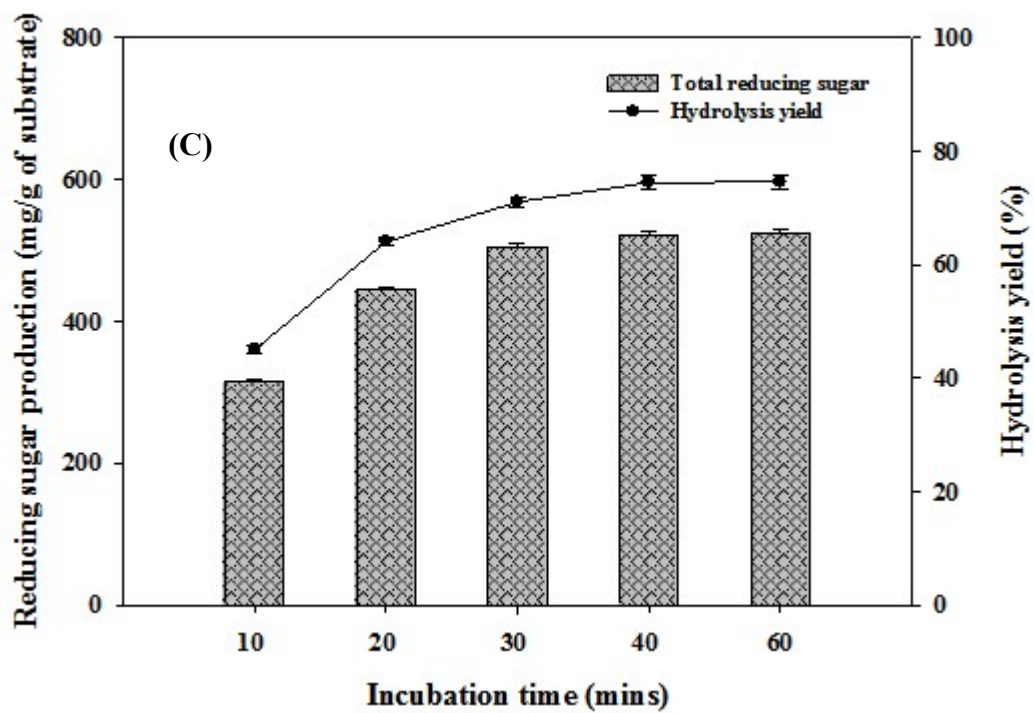

Fig. S2.

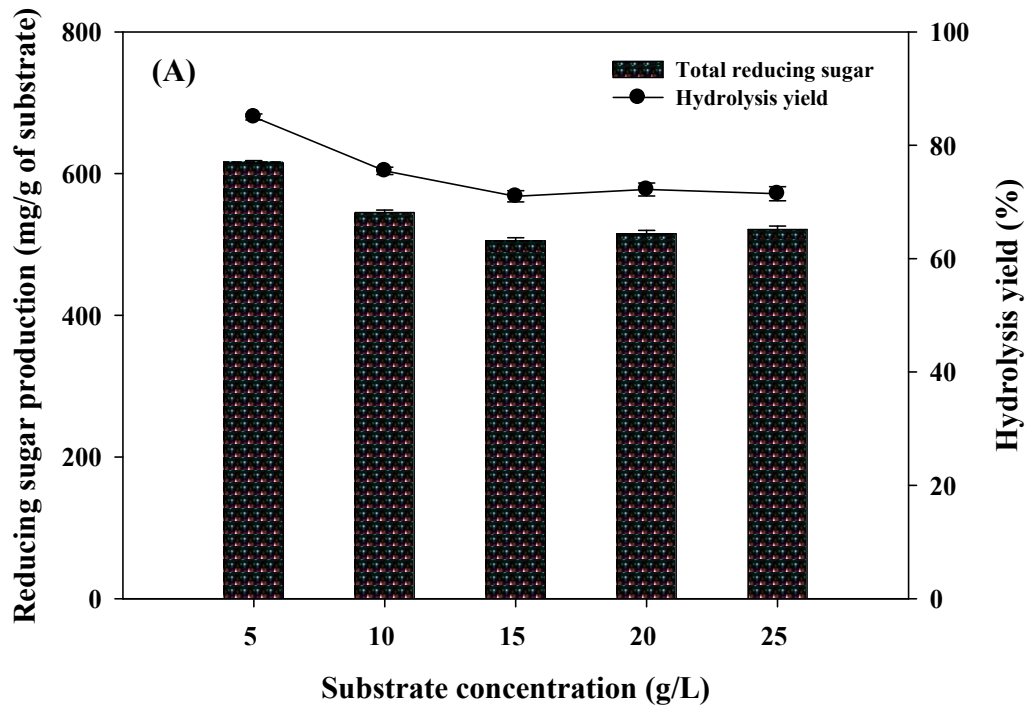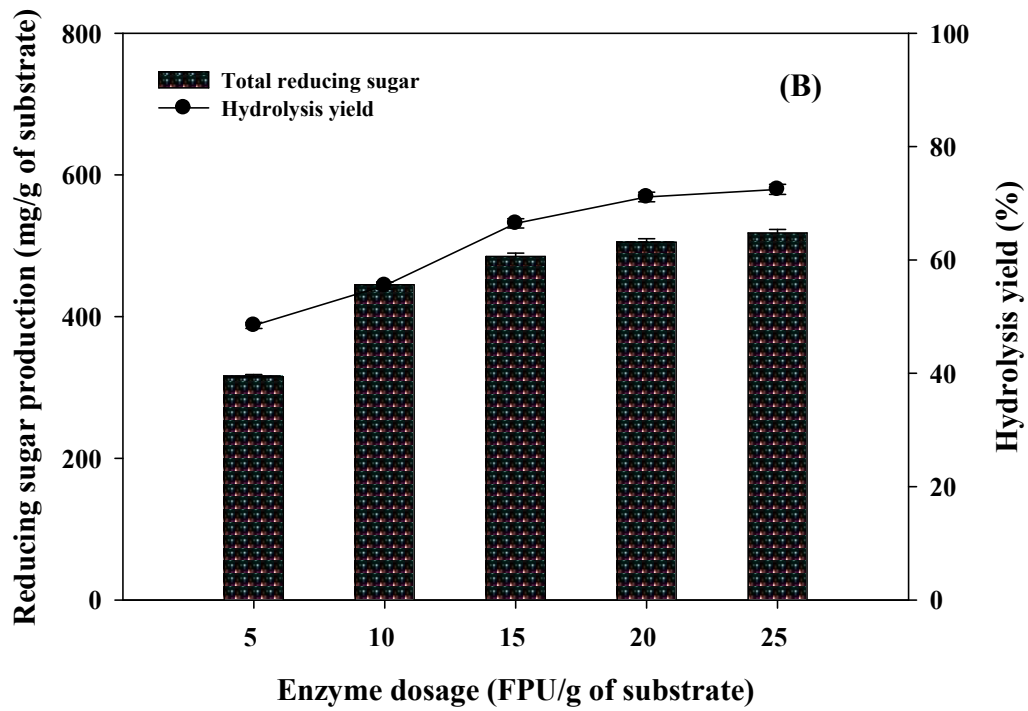

Fig. S3.

**Table S1.** Comparative evaluation of sugar release from pretreatment of conventional lignocellulosic biomass and *RWB*

| Lignocellulosic biomass                 | Pretreatment condition                                                                                                                                                   | Enzymes used                                                                                                                                    | TRS yield after EH (mg/g) | References                    |
|-----------------------------------------|--------------------------------------------------------------------------------------------------------------------------------------------------------------------------|-------------------------------------------------------------------------------------------------------------------------------------------------|---------------------------|-------------------------------|
| <i>Lantana camara</i>                   | 3% v/v H <sub>2</sub> SO <sub>4</sub> , 120 °C for 45 min, further delignification by Na <sub>2</sub> SO <sub>3</sub> and NaClO <sub>2</sub> before enzymatic hydrolysis | Cellulase from <i>Trichoderma reesei</i> (60 FPU g <sup>-1</sup> biomass) + $\beta$ -glucosidase (Novozyme 188) (180 U g <sup>-1</sup> biomass) | 695                       | Kuhad et al., 2010            |
| Switchgrass ( <i>Panicum virgatum</i> ) | AFEX (0.9 g g <sup>-1</sup> ammonia, 0.4 g g <sup>-1</sup> water, 80 °C, 20 min)                                                                                         | Accelerase® (3.2 FPU g <sup>-1</sup> biomass)                                                                                                   | 385                       | Bals et al., 2010             |
| Water hyacinth                          | 4% H <sub>2</sub> SO <sub>4</sub> + autoclaving at 121°C, 75 min                                                                                                         | Commercial cellulase (Zytex) 70 FPU g <sup>-1</sup> biomass                                                                                     | 723                       | Satyanagalakshmi et al., 2011 |
| Shea tree sawdust                       | Alkaline wet air oxidation                                                                                                                                               | Cellulase (25 FPU g <sup>-1</sup> ) (Zytex) + $\beta$ -glucosidase (12.5 U g <sup>-1</sup> )                                                    | 131                       | Ayeni et al., 2013            |
| Shea tree sawdust                       | Alkaline peroxide assisted wet air oxidation                                                                                                                             | Cellulase (25 FPU g <sup>-1</sup> ) (Zytex) + $\beta$ -glucosidase (12.5 U g <sup>-1</sup> of biomass)                                          | 274                       | Ayeni et al., 2013            |
| <i>Lantana camara</i>                   | Chlorite treatment, 4% (w/v), 30 min                                                                                                                                     | Cellulase (60 FPU g <sup>-1</sup> biomass) + $\beta$ -glucosidase (Novozyme 188) (180 U g <sup>-1</sup> biomass)                                | 925                       | Gupta et al., 2011            |
| <i>Prosopis juliflora</i>               | Chlorite treatment, 4% (w/v), 30 min                                                                                                                                     | Cellulase (60 FPU g <sup>-1</sup> biomass) + $\beta$ -glucosidase (Novozyme 188) (180 U g <sup>-1</sup> biomass)                                | 864                       | Gupta et al., 2011            |
| Switch grass                            | Microwave treatment, 0.1% alkali, 190°C, 30 min                                                                                                                          | Celluclast 1.5 L (12 FPU g <sup>-1</sup> biomass) + $\beta$ -gluco-sidase (Novozyme 188) (21 U g <sup>-1</sup> biomass)                         | 209                       | Hu and Wen, 2008              |
| Whole rice waste biomass                | 2% (v/v) NaOH +ASC+ SB, 121°C, 30 min                                                                                                                                    | Commercial cellulase (Sigma) 10 FPU g <sup>-1</sup> biomass                                                                                     | 725                       | This study                    |



## References

1. A.O. Ayeni, S. Banerjee, J.A. Omoleye, F.K. Hymore, B.S. Giri and S.C. Deshmukh, *Biomass Bioenergy*, 2013, **48**, 130–138.
2. B. Bals, C. Rogers, M. Jin, V. Balan and B. Dale, *Biotechnol. Biofuels*, 2010, **3**, 1.
3. Z. Hu and Z. Wen, *Biochem. Eng. J.*, 2008, **38**, 369–378.
4. R.C. Kuhad, R. Gupta, Y.P. Khasa and A. Singh, *Bioresour. Technol.*, 2010, **101**, 8348–8354.
5. K. Satyanagalakshmi, R. Sindhu, P. Binod, K.U. Janu, R.K. Sukumaran and A. Pandey, *J. Sci. Ind. Res.*, 2011, **70**, 156–161
